# Supplementary material for: High Rates of Liver Cirrhosis and Hepatocellular Carcinoma in Chronic Hepatitis B Patients with Metabolic and Cardiovascular Comorbidities
Source: MDPI journal article supplement (doi:10.3390/microorganisms9050968), 2021-04-30
Supplement: s1 [file s1]

**Supplementary Table S1.** Correlation between baseline parameters and occurrence of total events or HCC in cirrhosis patients (n=50) during follow-up analyzed by univariate und multivariate logistic regression. HCC= hepatocellular carcinoma, CHD= coronary heart disease, GGT= gamma-glutamyltransferase.

|                           | Total events                     |                                    | HCC                              |                                    |
|---------------------------|----------------------------------|------------------------------------|----------------------------------|------------------------------------|
|                           | Univariate analysis<br>(p-value) | Multivariate analysis<br>(p-value) | Univariate analysis<br>(p-value) | Multivariate analysis<br>(p-value) |
| <b>Obesity</b>            | 0.8688                           | -                                  | 0.7752                           | -                                  |
| <b>Diabetes</b>           | 0.3276                           | -                                  | 0.4023                           | -                                  |
| <b>Hypertension</b>       | 0.7504                           | -                                  | 0.5828                           | -                                  |
| <b>CHD</b>                | 0.6360                           | -                                  | 0.7040                           | -                                  |
| <b>Age</b>                | 0.0345                           | 0.067243                           | 0.0273                           | 0.027323                           |
| <b>GGT</b>                | 0.1120                           | -                                  | 0.0865                           | -                                  |
| <b>Low platelet count</b> | 0.0363                           | 0.040265                           | 0.0702                           | -                                  |
| <b>Albumin</b>            | 0.3041                           | -                                  | 0.3684                           | -                                  |
| <b>MELD score</b>         | 0.7640                           | -                                  | 0.6135                           | -                                  |
| <b>HBeAg status</b>       | 0.5210                           | -                                  | 0.5210                           | -                                  |

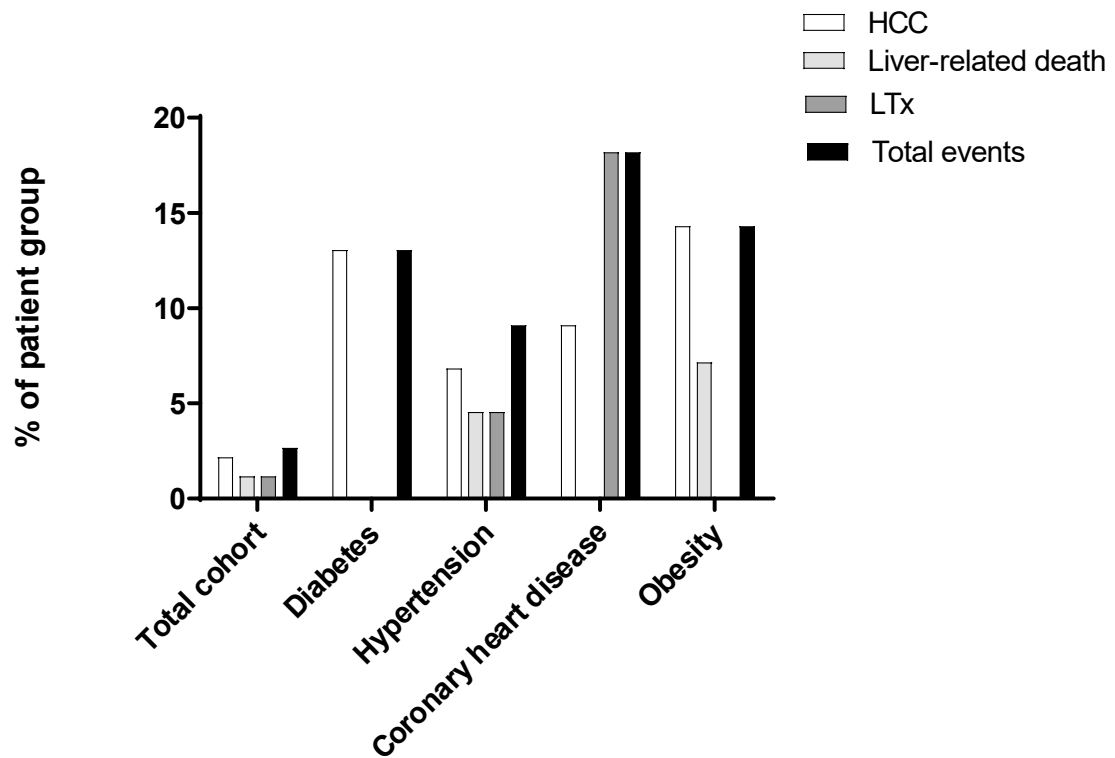

**Supplementary Figure S1.** Patient outcomes, including hepatocellular carcinoma (HCC), liver-related death, liver transplantation (LTx) and total events, are indicated for the metabolic subgroups: diabetes, hypertension, coronary heart disease (CHD) and obesity. No events occurred in the NAFLD group.
